# Supplementary material
Source: Frontiers journal article supplement (https://www.frontiersin.org/articles/474786)
Supplement: Table_2.xlsx [file Table_2.xlsx]

## Sheet: Sheet 1
Nest	Colony	Season	Pair_ring	Coordination data			Feeding data		Relative change	Diet data			Mean SST
				pvalue randomisation	Overlap ST-LT	Coordination index	Number of feedings	CV inter-feeding	in chick body mass	Mean energy density	Mean ratio of abundance CgV-CfV	Mean Simson Diversity index
M.M23	Magdalenefjorden	2009	41164_41158	0.862	0.177083	-0.369295	23	0.946763		33.0433	5.14631	0.481756	1.90515
M.M41	Magdalenefjorden	2009	41186_41191	0.7534	0.0381944	-0.615555	10	1.13044		33.0433	5.14631	0.481756	1.90515
M.F23	Magdalenefjorden	2009	41439_41427	0.2393	0.204861	0.385302	16	0.599137		33.0433	5.14631	0.481756	1.90515
M.M31	Magdalenefjorden	2009	41189_41163	0.3589	0.232639	0.165189	15	0.733637		33.0433	5.14631	0.481756	1.90515
M.F11	Magdalenefjorden	2009	41411_41425	0.808	0.0625	-0.491498	14	1.44801		33.0433	5.14631	0.481756	1.90515
M.M42	Magdalenefjorden	2009	41453_41444	0.8085	0.100694	-0.485599	13	1.01252		33.0433	5.14631	0.481756	1.90515
M.M25	Magdalenefjorden	2009	41423_41414	0.7435	0.15625	-0.291757	18	1.09992		33.0433	5.14631	0.481756	1.90515
M.M35	Magdalenefjorden	2009	41166_41172	0.0002	0.350694	1.26143	20	0.592401		33.0433	5.14631	0.481756	1.90515
M.F33	Magdalenefjorden	2009	41456_41461	0.3287	0.350694	0.221319	26	0.653478		33.0433	5.14631	0.481756	1.90515
M.M29	Magdalenefjorden	2009	41162_41443	0.4602	0.15625	0.0867649	19	0.905585		33.0433	5.14631	0.481756	1.90515
M.M39	Magdalenefjorden	2009	41181_41431	0.1926	0.0972222	0.503582	16	1.02811		33.0433	5.14631	0.481756	1.90515
M.F22	Magdalenefjorden	2009	41173_41185	0.4469	0.173611	0.0272467	20	0.774271		33.0433	5.14631	0.481756	1.90515
M.M44	Magdalenefjorden	2009	41308_41438	0.115	0.53125	0.472709	23	0.707122		33.0433	5.14631	0.481756	1.90515
M.M24	Magdalenefjorden	2009	41413_41430	0.5579	0.270833	-0.0235255	15	0.772889	0.438596	33.0433	5.14631	0.481756	1.90515
M.M34	Magdalenefjorden	2009	41412_41424	0.801	0.15625	-0.425363	23	1.29131		33.0433	5.14631	0.481756	1.90515
M.F20	Magdalenefjorden	2009	41434_41426	0.9379	0.0868056	-0.615574	22	1.18266		33.0433	5.14631	0.481756	1.90515
M.M25	Magdalenefjorden	2010	41423_41414	0.6447	0.118056	-0.312088	13	1.21831		41.8756	11.5064	0.38783	2.22878
M.F47	Magdalenefjorden	2010	41881_41880	0.7578	0.184028	-0.218126	19	0.980346		41.8756	11.5064	0.38783	2.22878
M.M35	Magdalenefjorden	2010	41166_41434	0.7146	0.180556	-0.242819	19	1.3895		41.8756	11.5064	0.38783	2.22878
M.M24	Magdalenefjorden	2010	41413_41430	0.2422	0.399306	0.333763	18	1.32028		41.8756	11.5064	0.38783	2.22878
M.M25a	Magdalenefjorden	2010	41884_41883	0.0609	0.315972	0.660848	16	0.677965		41.8756	11.5064	0.38783	2.22878
M.M41	Magdalenefjorden	2010	41186_41191	0.9311	0.0902778	-0.641271	18	1.41967		41.8756	11.5064	0.38783	2.22878
M.M39	Magdalenefjorden	2010	41431_41181	0.1936	0.371528	0.673057	20	0.556943		41.8756	11.5064	0.38783	2.22878
M.M44	Magdalenefjorden	2010	41438_41308	0.0197	0.520833	0.848265	19	0.558469		41.8756	11.5064	0.38783	2.22878
M.M29	Magdalenefjorden	2010	41443_41162	0.4133	0.260417	0.0331461	19	1.03354		41.8756	11.5064	0.38783	2.22878
M.M31	Magdalenefjorden	2010	41163_41189	0.5335	0.197917	-0.173025	18	0.866582		41.8756	11.5064	0.38783	2.22878
M.M23	Magdalenefjorden	2010	41158_41164	0.2865	0.368056	0.250783	25	0.802804		41.8756	11.5064	0.38783	2.22878
M.F31	Magdalenefjorden	2010	41306_41875	0.0213	0.409722	0.972284	16	0.687367		41.8756	11.5064	0.38783	2.22878
M.M20a	Magdalenefjorden	2010	41890_41150	0.3505	0.305556	0.278419	21	0.473493		41.8756	11.5064	0.38783	2.22878
M.F33	Magdalenefjorden	2010	41456_41882	0.0001	0.458333	0.648218	15	0.960294		41.8756	11.5064	0.38783	2.22878
M.M43	Magdalenefjorden	2010	41446_41194	0.1615	0.392361	0.431929	24	0.558749		41.8756	11.5064	0.38783	2.22878
M.M34	Magdalenefjorden	2010	41425_41424	0.0677	0.444444	0.694061	23	0.585744		41.8756	11.5064	0.38783	2.22878
M.M28	Magdalenefjorden	2010	41161_41429	0.2801	0.354167	0.272542	20	0.983113		41.8756	11.5064	0.38783	2.22878
M.F11	Magdalenefjorden	2010	41411_44022	0.7922	0.121528	-0.401762	14	1.34932		41.8756	11.5064	0.38783	2.22878
M.F22	Magdalenefjorden	2010	41173_44021	0.7331	0.25	-0.295544	19	0.99167		41.8756	11.5064	0.38783	2.22878
101	Hornsund	2016	48567_48575	0.4255	0.184028	-0.0542622	18	1.25075	6.52174	31.8336	7.42987	0.42927	6.44032
11_58	Hornsund	2016	26937_26859	0.4635	0.204861	0.0230463	16	0.569683		31.8336	7.42987	0.42927	6.44032
12_16	Hornsund	2016	50259_50301	0.1901	0.607639	0.0521076	20	0.641975	13.7931	31.8336	7.42987	0.42927	6.44032
12_26	Hornsund	2016	48545_48566	0.0226	0.239583	0.482844	21	0.568587		31.8336	7.42987	0.42927	6.44032
14_10M	Hornsund	2016	48546_48568	0.4353	0.319444	0.0621067	15	1.10756	6.89655	31.8336	7.42987	0.42927	6.44032
14_12M	Hornsund	2016	50096_48556	0.2335	0.25	0.370431	18	0.895576	8.88889	31.8336	7.42987	0.42927	6.44032
D15_11	Hornsund	2016	50070_50230	0.2739	0.0798611	0.664905	8	1.39742	-1.53257	31.8336	7.42987	0.42927	6.44032
D15_13	Hornsund	2016	50033_35945	0.3332	0.368056	0.10834	19	0.90627	14.3519	31.8336	7.42987	0.42927	6.44032
D15_13G	Hornsund	2016	43812_50225	0.9045	0.0590278	-0.67837	18	1.01624	10.989	31.8336	7.42987	0.42927	6.44032
D15_5	Hornsund	2016	26555_26557	0.3852	0.305556	0.127465	19	0.877105	18.7135	31.8336	7.42987	0.42927	6.44032
D15_8	Hornsund	2016	46021_31277	0.629	0.131944	-0.188696	14	0.984914	6.14035	31.8336	7.42987	0.42927	6.44032
D16_1	Hornsund	2016	48455_50303	0.2267	0.190972	0.687339	16	1.05966	8.54701	31.8336	7.42987	0.42927	6.44032
K16_4	Hornsund	2016	50302_50097	0.8756	0.0590278	-0.636886	14	0.854473	6.06061	31.8336	7.42987	0.42927	6.44032
K4	Hornsund	2016	46030_50093	0.1428	0.444444	0.464144	20	0.683021		31.8336	7.42987	0.42927	6.44032
K8	Hornsund	2016	44931_50217	0.01	0.215278	0.618495	19	0.997829	4.16667	31.8336	7.42987	0.42927	6.44032
W6(D15_6)	Hornsund	2016	50099_50088	0.8412	0.114583	-0.356805	12	0.993984	8.16993	31.8336	7.42987	0.42927	6.44032
D15_13G	Hornsund	2017	43812_50225	0.0293	0.315972	0.928816	19	0.96595	24.2465	34.1081	11.4863	0.296556	5.59488
W6	Hornsund	2017	50088_50099	0.5216	0.20979	-0.0464203	20	0.805118	9.81241	34.1081	11.4863	0.296556	5.59488
D17_14	Hornsund	2017	50491_50500	0.8506	0.0526316	-0.767941	20	1.0098	8.81509	34.1081	11.4863	0.296556	5.59488
W39	Hornsund	2017	46028_50152	0.4216	0.246528	0.203626	17	0.691947	9.55285	34.1081	11.4863	0.296556	5.59488
D17_16	Hornsund	2017	50165_50172	0.1744	0.181185	0.60001	17	0.605633	10.0145	34.1081	11.4863	0.296556	5.59488
W38A	Hornsund	2017	46025_46070	0.6343	0.09375	-0.351164	16	0.853063	15.4782	34.1081	11.4863	0.296556	5.59488
W40	Hornsund	2017	41260_43817	0.5585	0.125	-0.137731	23	0.922958	12.2856	34.1081	11.4863	0.296556	5.59488
K17_25	Hornsund	2017	43761_50494	0.9613	0.0208333	-0.898232	23	1.53344		34.1081	11.4863	0.296556	5.59488
11_36	Hornsund	2017	50499_43841	0.9825	0	-1	22	1.48403	18.2432	34.1081	11.4863	0.296556	5.59488
D16_10	Hornsund	2017	43873_48559	0.7318	0.0451389	-0.553533	12	1.67898	9.78009	34.1081	11.4863	0.296556	5.59488
11_58	Hornsund	2017	26937_26859	0.9307	0.0138889	-0.918096	19	1.63418	15.5109	34.1081	11.4863	0.296556	5.59488
W39B	Hornsund	2017	50167_50327	0.0001	0.208333	1.42752	11	1.3261	14.9967	34.1081	11.4863	0.296556	5.59488
D15_5	Hornsund	2017	26555_26557	0.9144	0.0659722	-0.682122	19	1.58837	26.7932	34.1081	11.4863	0.296556	5.59488
W49	Hornsund	2017	43858_50492	0.8603	0.0138889	-0.887058	13	1.71476	21.4953	34.1081	11.4863	0.296556	5.59488
D17_15	Hornsund	2018	55407_50173	0.4185	0.163194	0.127004	17	1.45298	7.13628	36.8582	20.1351	0.212604	5.35854
K8	Hornsund	2018	44931_55404	0.1885	0.21875	0.576821	15	0.902867	11.7805	36.8582	20.1351	0.212604	5.35854
D16_1	Hornsund	2018	50303_48455	0.0076	0.472222	1.05628	21	0.724566	7.42049	36.8582	20.1351	0.212604	5.35854
11_58	Hornsund	2018	55405_26937	0.8893	0.21875	-0.332931	25	1.04088	6.86992	36.8582	20.1351	0.212604	5.35854
D17_8	Hornsund	2018	50290_48597	0.0923	0.409722	0.585906	21	0.428077	7.4991	36.8582	20.1351	0.212604	5.35854
101	Hornsund	2018	50161_48567	0.6432	0.270833	-0.112611	22	1.24885	3.21285	36.8582	20.1351	0.212604	5.35854
K17_15	Hornsund	2018	50498_50153	0.6107	0.197917	-0.156324	23	1.4037	4.02622	36.8582	20.1351	0.212604	5.35854
113_10	Hornsund	2018	50135_50495	0.1667	0.232639	0.40859	19	0.858807	14.1653	36.8582	20.1351	0.212604	5.35854
113_41	Hornsund	2018	44892_46155	0.0929	0.402778	0.621269	22	0.564649	5.8299	36.8582	20.1351	0.212604	5.35854
14_18K	Hornsund	2018	50468_43004	0.0137	0.388889	0.86968	19	1.1304	4.21705	36.8582	20.1351	0.212604	5.35854
14_6K	Hornsund	2018	48518_50154	0.1161	0.378472	0.647509	22	0.886494	6.5745	36.8582	20.1351	0.212604	5.35854
D17_14	Hornsund	2018	50491_50500	0.8596	0.0659722	-0.707776	19	1.10077	6.08696	36.8582	20.1351	0.212604	5.35854
12_16	Hornsund	2018	50259_50138	0.7972	0.03125	-0.734274	19	1.46433	5.31046	36.8582	20.1351	0.212604	5.35854
D15_5	Hornsund	2018	26555_55401	0.1529	0.322917	0.514175	17	0.837861		36.8582	20.1351	0.212604	5.35854
NI	Hornsund	2018	50150_55408	0.3609	0.0694444	0.441712	8	1.22534	30.6122	36.8582	20.1351	0.212604	5.35854
11_75	Hornsund	2018	55403_10905	0.3297	0.284722	0.171931	14	0.840493		36.8582	20.1351	0.212604	5.35854
